# Supplementary material for: Prevalence and Multidimensional Risk Factors of Physical Frailty in Korean Community-Dwelling Older Adults: Findings from Korean Frailty and Aging Cohort Study
Source: Preprints.org preprint supplement (doi:10.20944/preprints202009.0423.v1), 2020-09-18
Supplement: Supplementary file 1 [file supplementary]

## Supplementary materials

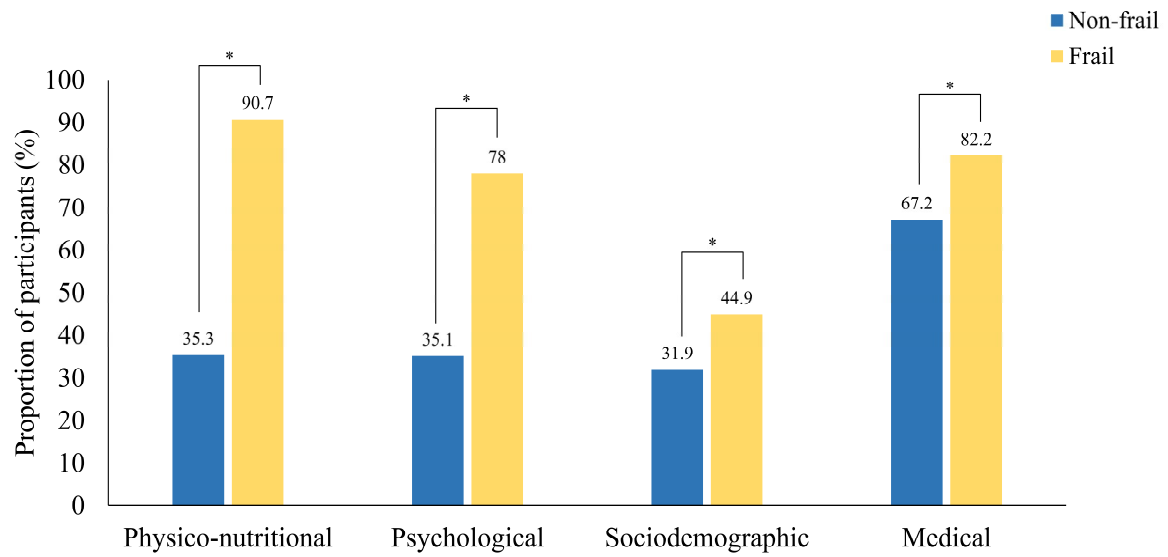

**Figure S1.** The proportion of risk domains across the frailty status (unstandardized sample); The frailty status was classified into non-frail and frail. The physico-nutritional domain was defined as having  $\geq 1$  risk of malnutrition, sarcopenia, severe mobility limitation, longer timed up and go ( $>12$  seconds), and low short physical performance battery ( $\leq 9$  scores). The psychological domain was defined as having  $\geq 1$  depressive symptom and poor self-perceived health. The sociodemographic domain was defined as having  $\geq 1$  of rural residence and poor social capital. The medical domain was defined as having  $\geq 1$  of polypharmacy, elevated hs-CRP ( $\geq 3$  mg/L), elevated HbA1c ( $\geq 6.5\%$ ), and low 25-hydroxyvitamin D ( $\leq 20$  ng/mL). \*  $p < 0.001$ .

**Table S1.** Prevalence of frailty status and component (unstandardized sample)

| Variable                  | Unstandardized sample, n (%) |                           |                             | <i>p</i> Value |
|---------------------------|------------------------------|---------------------------|-----------------------------|----------------|
|                           | Overall<br>n=2,907           | Men<br>n=1,383<br>(47.6%) | Women<br>n=1,524<br>(52.4%) |                |
| <b>Frailty status</b>     |                              |                           |                             |                |
| Robust                    | 1313 (45.2)                  | 695 (50.3)                | 618 (40.6)                  |                |
| Pre-frail                 | 1366 (47.0)                  | 590 (42.7)                | 776 (50.9)                  | <0.001         |
| Frail                     | 228 (7.8)                    | 98 (7.1)                  | 130 (8.5)                   |                |
| <b>Frailty component</b>  |                              |                           |                             |                |
| Exhaustion                | 915 (31.5)                   | 306 (33.4)                | 609 (66.4)                  | <0.001         |
| Low physical activity     | 310 (10.7)                   | 153 (11.1)                | 157 (10.3)                  | 0.507          |
| Slowness                  | 590 (20.3)                   | 284 (20.5)                | 306 (20.1)                  | 0.760          |
| Weakness                  | 588 (20.0)                   | 281 (20.3)                | 307 (20.1)                  | 0.907          |
| Unintentional weight loss | 141 (4.9)                    | 74 (5.4)                  | 67 (4.4)                    | 0.232          |
| <b>Frailty score</b>      |                              |                           |                             |                |
| 0                         | 1313 (45.2)                  | 695 (50.3)                | 618 (40.6)                  |                |
| 1                         | 936 (32.2)                   | 404 (29.2)                | 532 (34.9)                  |                |
| 2                         | 430 (14.8)                   | 186 (13.4)                | 244 (16.0)                  |                |
| 3                         | 168 (5.8)                    | 71 (5.1)                  | 97 (6.4)                    | <0.001         |
| 4                         | 56 (1.9)                     | 26 (1.9)                  | 30 (2.0)                    |                |
| 5                         | 4 (0.1)                      | 1 (0.1)                   | 3 (0.2)                     |                |
